# Supplementary material for: A fluorinated ionizable lipid improves the mRNA delivery efficiency of lipid nanoparticles
Source: Royal Society of Chemistry journal article supplement (doi:10.1039/d3tb00516j), 2023-01-01
Supplement: d3tb00516j1.pdf [file d3tb00516j1.pdf]

## Supplementary information for

# Fluorinated ionizable lipid improves mRNA delivery efficiency of lipid nanoparticle

Haonan Huo<sup>1,2†</sup>, Xingdi Cheng<sup>1†</sup>, Jiayi Xu<sup>3</sup>, Jiaqi Lin<sup>4\*</sup>, Ning Chen<sup>3\*</sup>, and Xueguang Lu<sup>1,2\*</sup>

<sup>1</sup> Beijing National Laboratory for Molecular Sciences, CAS Key Laboratory of Colloid, Interface and Chemical Thermodynamics, Institute of Chemistry, Chinese Academy of Sciences, Beijing 100190, China

<sup>2</sup> University of Chinese Academy of Sciences, Beijing, China 100049, China

<sup>3</sup> State Key Laboratory of Chemical Resource Engineering, Department of Organic Chemistry, College of Chemistry, Beijing University of Chemical Technology, Beijing 100029, China

<sup>4</sup> Key State Laboratory of Fine Chemicals, School of Bioengineering, Dalian University of Technology, Dalian 116024, China

† These authors contributed equally

\* Correspondence: [jqlin@dlut.edu.cn](mailto:jqlin@dlut.edu.cn) (J. L.); [chenning@mail.buct.edu.cn](mailto:chenning@mail.buct.edu.cn) (N. C.); [xueguang@iccas.ac.cn](mailto:xueguang@iccas.ac.cn) (X. L.); Tel.: +86-10-62584391 (X. L.)

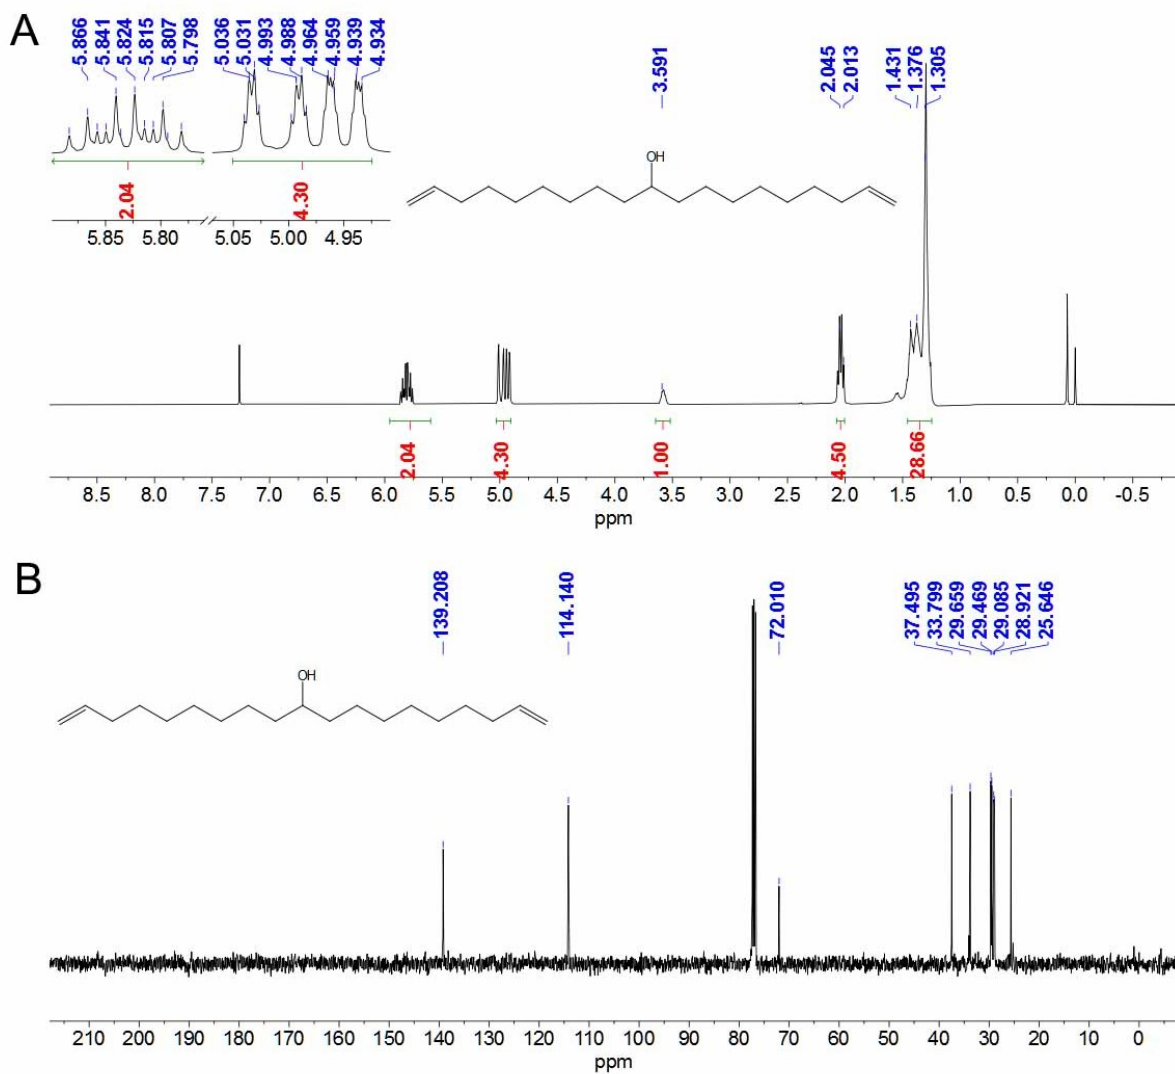

**Figure S1.** <sup>1</sup>H (A) and <sup>13</sup>C NMR (B) spectra of nonadeca-1,18-dien-10-yl-8-bromooctanoate.

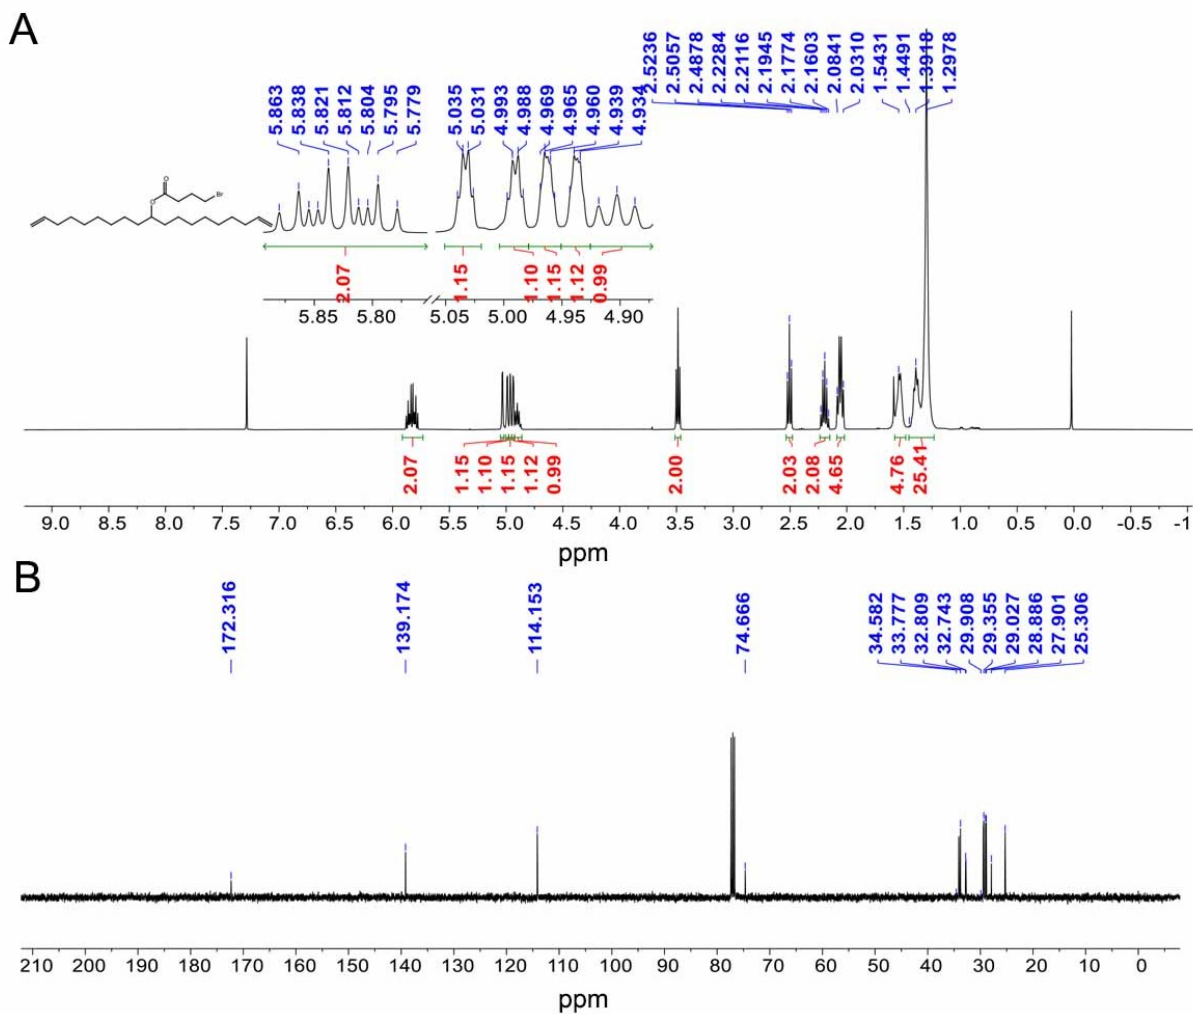

**Figure S2** <sup>1</sup>H (A) and <sup>13</sup>C NMR (B) spectra of nonadeca-1,18-dien-10-yl-8-bromooctanoate.

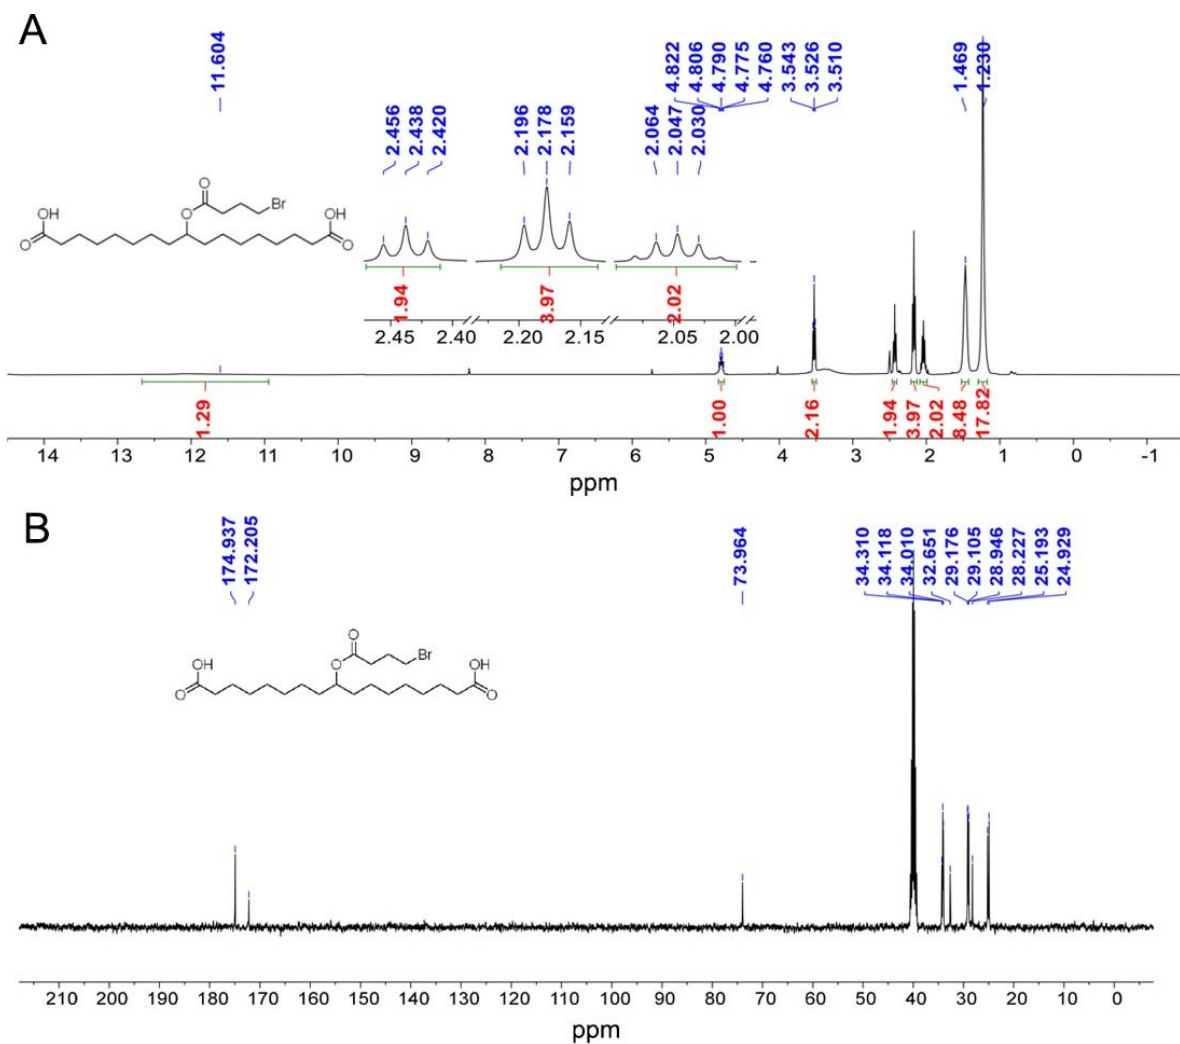

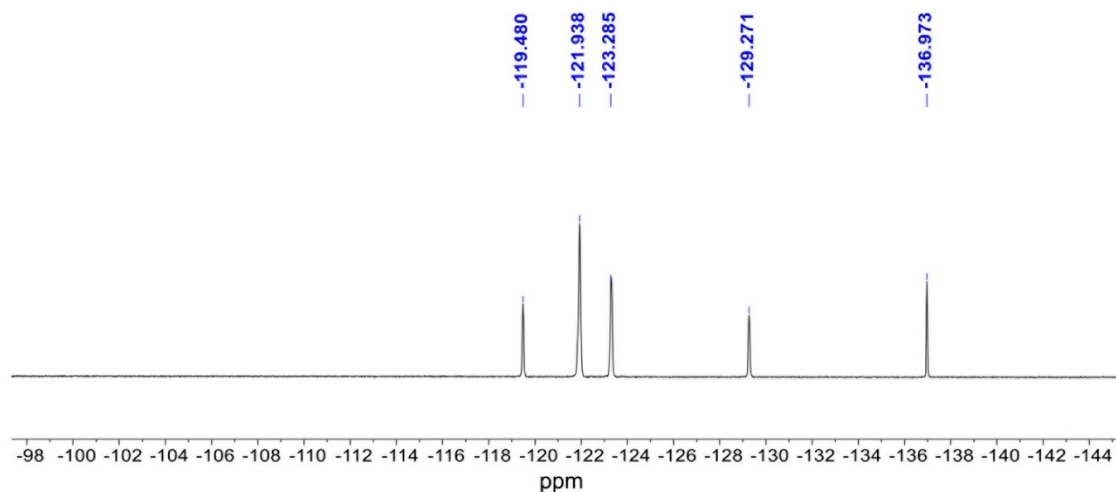

**Figure S4.**  $^{19}\text{F}$  NMR spectrum of F-L319.

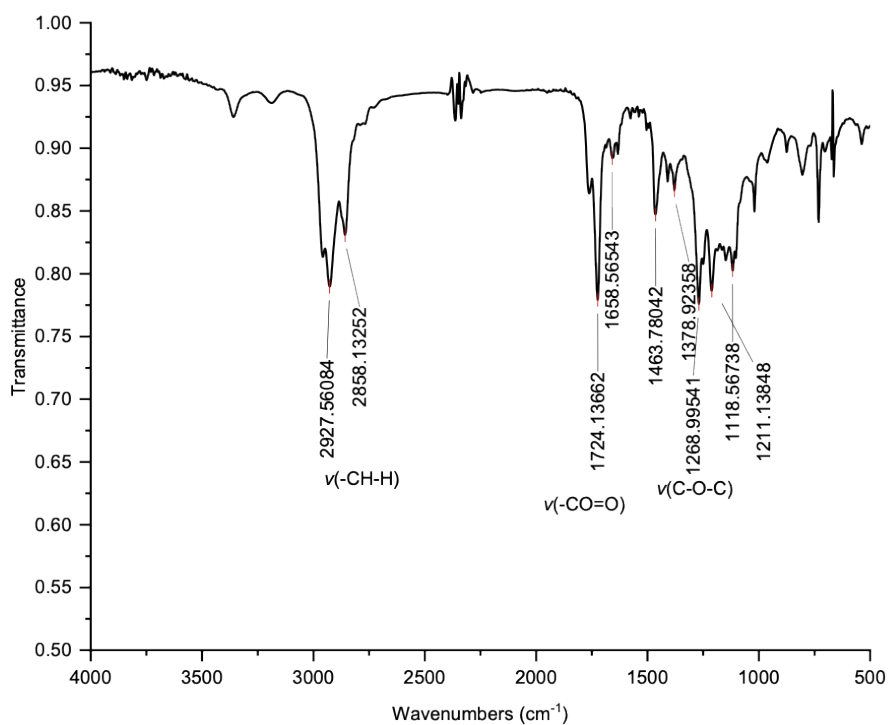

**Figure S5.** Fourier-transform infrared spectroscopy (FT-IR) spectrum of F-L319.

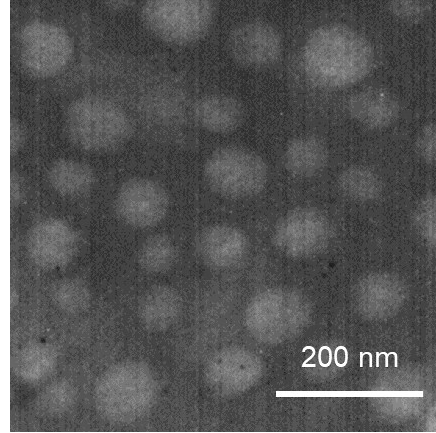

**Figure S6.** A representative TEM image of hybrid-LNP1.

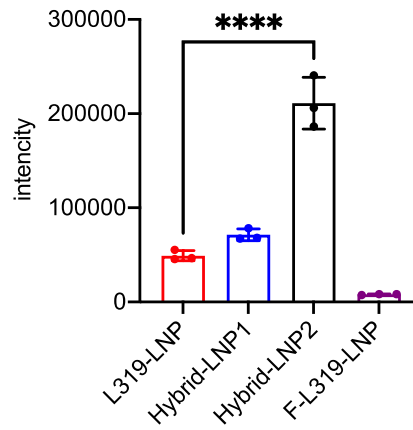

**Figure S7.** Transfection efficiency of the LNPs in DC2.4 cells after 24 h incubation (n = 3).

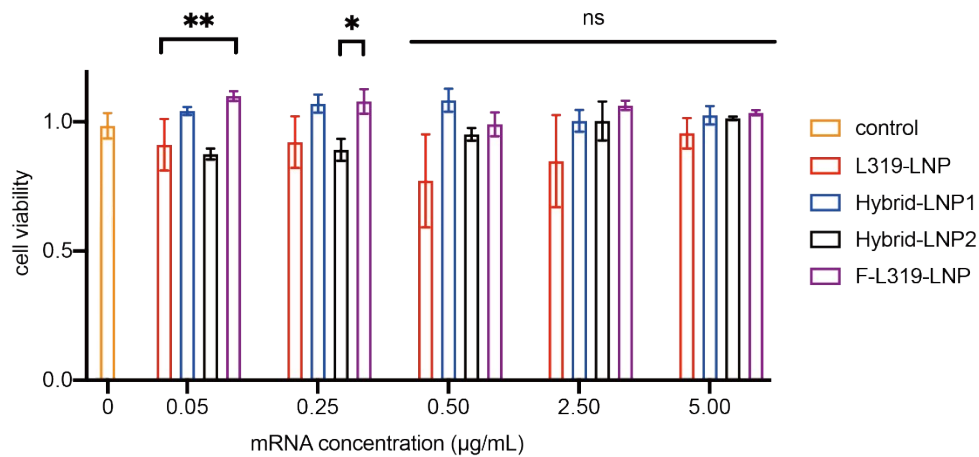

**Figure S8.** Cell viability after incubation with LNPs at different concentrations of mRNA. Data were normalized to untreated cells. Data are shown as mean  $\pm$  SD, n = 3 technical replicates.

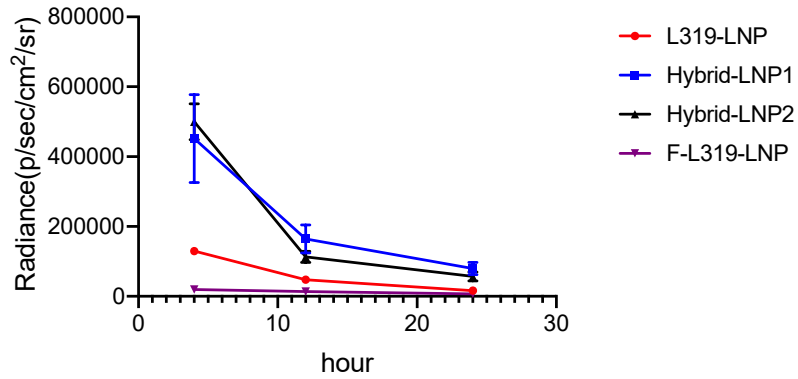

**Figure S9.** Luciferase expression of LNPs over time in mice (n = 5 biologically independent samples).

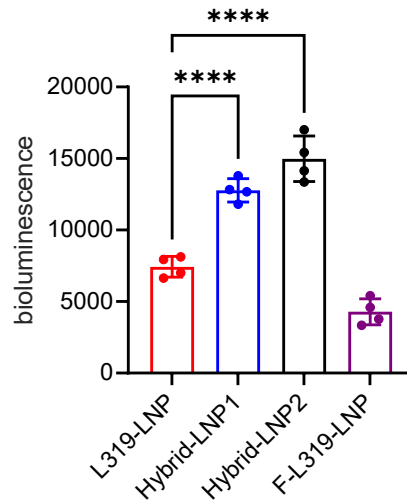

**Figure S10.** Transfection efficiency of LNPs in RAW264.7 cells after 12 h incubation (n = 4).

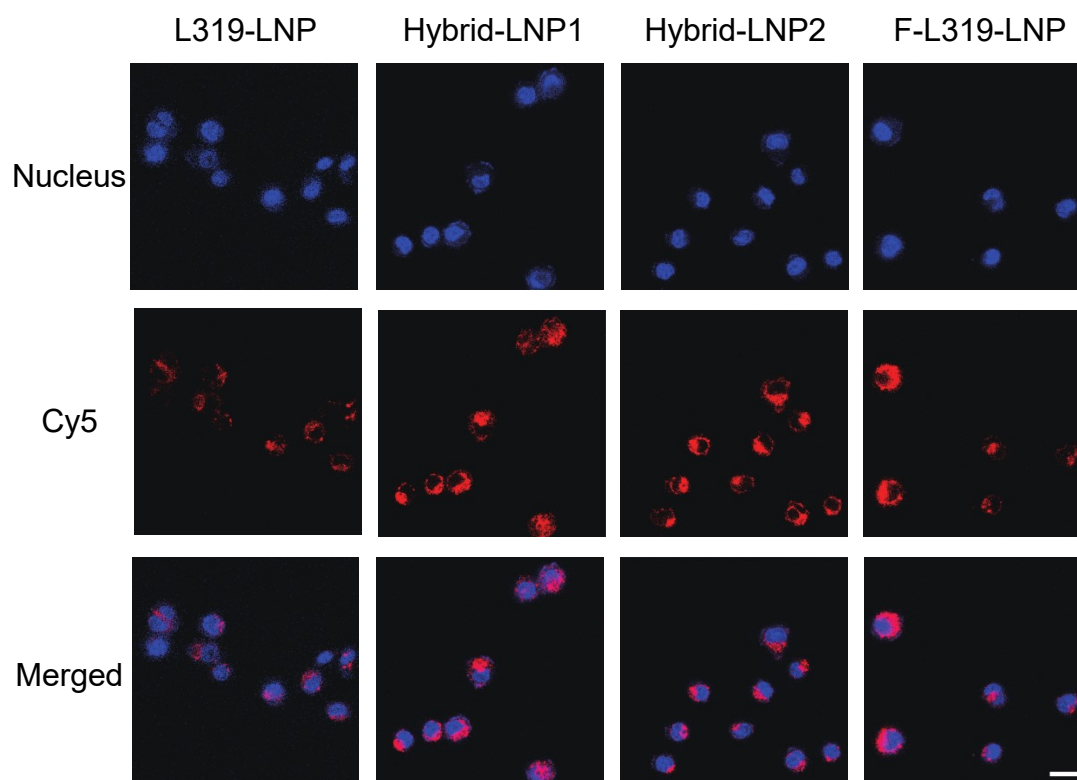

**Figure S11.** Confocal fluorescence microscopy images of DC2.4 cells treated with LNPs. The scale bar is 20  $\mu\text{m}$ .
